LRH: Carrera, et al.,

RRH: Endemic and epidemic alphaviruses

# Endemic and epidemic human alphavirus infections in Eastern Panama; An Analysis of Population-based Cross-Sectional Surveys

Jean-Paul Carrera<sup>1,2¶\*</sup>, Zulma M. Cucunubá<sup>3¶</sup>, Karen Neira<sup>4</sup>, Ben Lambert<sup>3</sup>, Yaneth Pittí<sup>1</sup>, Carmela Jackman<sup>5</sup>, Jesus Liscano<sup>6</sup>, Jorge L. Garzón<sup>1</sup>, Davis Beltran<sup>1</sup>, Luisa Collado-Mariscal<sup>7</sup>, Lisseth Saenz<sup>1</sup>, Néstor Sosa<sup>8</sup>, Luis D. Rodriguez-Guzman<sup>6</sup>, Publio González<sup>9</sup>, Andrés G. Lezcano<sup>4</sup>, Reneé Pereyra-Elías<sup>10,11</sup>, Anayansi Valderrama<sup>7</sup>, Scott C. Weaver<sup>12,13</sup>, Amy Y. Vittor<sup>14</sup>, Blas Armien<sup>9,15</sup>, Juan-Miguel Pascale<sup>8</sup> and Christl A. Donnelly<sup>3,16\*</sup>

<sup>1</sup> Department of Zoology, University of Oxford, Oxford, United Kingdom

<sup>2</sup> Department of Research in Virology and Biotechnology, Gorgas Memorial Institute of Health Studies, Panama City, Panama

<sup>3</sup>MRC Center for Global Infectious Disease Analysis (MRC-GIDA), Department of Infectious Disease Epidemiology, Imperial College London, London, United Kingdom

<sup>4</sup>Emerging infectious Disease and Climate Change Unit, Universidad Peruana Cayetano Heredia, Lima, Perú

<sup>5</sup>Regional Department of Epidemiology, Ministry of Health, Darien, Panama;

<sup>6</sup>School of Medicine, Columbus University, Panama City, Panama

<sup>7</sup>Department of Medical Entomology, Gorgas Memorial Institute of Health Studies, Panama City, Panama

<sup>8</sup>Clinical Research Unit, Gorgas Memorial Institute of Health Studies, Panama City, Panama

<sup>9</sup>Department of Research in Emerging and Zoonotic Diseases, Gorgas Memorial Institute of Health Studies, Panama City, Panama

<sup>10</sup>Nuffield Department of Population Health, University of Oxford, Oxford, United Kingdom

<sup>11</sup>School of Medicine, Universidad Peruana de Ciencias Aplicadas, Lima, Perú

<sup>12</sup>Institute for Human Infections and Immunity, University of Texas Medical Branch, Galveston, Texas

<sup>13</sup>Department of Microbiology and Immunology, University of Texas Medical Branch, Galveston, Texas

<sup>14</sup>Department of Medicine and Emerging Pathogens Institute, University of Florida, Gainesville, Florida

<sup>15</sup>Universidad Interamericana de Panama, Panama City, Panama

<sup>16</sup>Department of Statistics, University of Oxford, Oxford, United Kingdom

Key words: alphaviruses, cross-sectional study, force-of-infection, outbreaks, seroprevalence

\*Address correspondence to: [jean.carrera@zoo.ox.ac.uk](mailto:jean.carrera@zoo.ox.ac.uk); [jpcarrera@gorgas.gob.pa](mailto:jpcarrera@gorgas.gob.pa) or [c.donnelly@imperial.ac.uk](mailto:c.donnelly@imperial.ac.uk), [christl.donnelly@stats.ox.ac.uk](mailto:christl.donnelly@stats.ox.ac.uk)

¶ These authors contributed equally

## Author summary.

Prior to 2010, it was believed that the Madariaga virus (MADV) was primarily associated with equine disease. However, an outbreak reported in Panama, in an endemic area where Venezuelan equine encephalitis virus (VEEV) also circulates, suggested a change in its epidemiological profile. We aimed to reconstruct the epidemiological dynamics of MADV and VEEV, as well as additional alphaviruses known to circulate in the region in order to understand MADV emergence. For this, cross-sectional serosurveys were used to demonstrate that the Alphaviruses MADV, VEEV and Una virus have repeatedly infected humans in eastern Panama over the past five decades. Whilst their historical transmission has been low, we confirm that the transmission has recently increased for both MADV and VEEV.

## Abstract

**Background.** Madariaga virus (MADV), has recently been associated with severe human disease in Panama, where the closely related Venezuelan equine encephalitis virus (VEEV) also circulates. In June, 2017, a fatal MADV infection was confirmed in a community of Darien province.

**Methods.** We conducted a cross-sectional outbreak investigation with human and mosquito collections in July 2017, where sera were tested for alphavirus antibodies and viral RNA. Additionally, by applying a catalytic, force-of-infection statistical model to two serosurveys from Darien province in 2012 and 2017, we investigated whether endemic or epidemic alphavirus transmission occurred historically.

**Results.** In 2017, MADV and VEEV IgM seroprevalence was 1.6% and 4.4%, respectively; IgG antibody prevalences were MADV: 13.2%; VEEV: 16.8%; Una virus (UNAV): 16.0%; and Mayaro virus (MAYV): 1.1%. Active viral circulation was not detected. Evidence of MADV and UNAV infection was found near households — raising questions about its vectors and enzootic transmission cycles. Insomnia was associated with MADV and VEEV infection, depression symptoms were associated with MADV, and dizziness with VEEV and UNAV. Force-of-infection analyses suggest endemic alphavirus transmission historically, with recent increased human exposure to MADV and VEEV in some regions.

**Conclusions.** The lack of additional neurological cases suggest that severe MADV and VEEV infections occur only rarely. Our results indicate that, over the past five decades, alphavirus infections have occurred at low levels in eastern Panama, but that MADV and VEEV infections have recently increased — potentially during the past decade. Endemic infections and outbreaks of MADV and VEEV appear to differ spatially.

## Introduction

Alphaviruses (*Togaviridae: Alphavirus*) are important zoonotic, single-stranded RNA arthropod-borne viruses associated with febrile, severe and sometimes fatal disease in the Americas[1]. Among the most important alphaviruses are eastern equine encephalitis (EEEV), and Venezuelan equine encephalitis viruses (VEEV), and members of the Semliki Forest antigenic complex. These viruses have caused explosive epidemics of human encephalitis and arthritogenic disease in Latin American tropical regions[2,3].

EEEV has recently been reclassified as two different species: EEEV in North America and Madariaga virus (MADV) in other parts of Latin America[4] — each with different predispositions to cause human disease[5]. In 2010, we reported severe neurologic disease in humans associated with MADV infection in Panama[6]. The mechanism underlying this outbreak remains unknown, but age-specific seroprevalence data obtained during the 2010 and 2012 studies suggest recent MADV emergence in Panama[7,8]. VEEV is a cause of encephalitis and other pathologies of the central nervous system that can lead to death in humans and domesticated animals in the Americas. This virus causes explosive human and equine epidemics/epizootics, which occur chiefly in South and Central America[9], where the enzootic cycle involves *Culex* mosquitoes (subgenus *Melanoconion*) and sylvatic rodents[10]. Sometimes VEEV causes epizootic outbreaks due to viral adaptations for infection of equids and mosquitoes that allow it to spread rapidly among human and animal populations[11].

The Semliki Forest alphavirus complex includes Mayaro virus (MAYV) and UNAV, which are mostly found in the Amazon region of Peru, Brazil and Venezuela and are characterized by fever and arthralgia, the latter which can persist for years [12]. In the Americas, sizeable human MAYV outbreaks have most often been reported in the Amazon Basin, although, recently this virus was isolated from a febrile child in Haiti, suggesting it may be moving beyond its established territory[13]. UNAV has been detected at low levels during epidemiological studies and surveillance[14,15] but, because this virus has rarely been associated with human disease, the risk to people living in endemic Latin America remains unclear[16]. Both MAYV and UNAV are vectored by forest mosquitoes: *Haemagogus janthinomys* mosquitoes are the primary vectors of MAYV[16], while *Psorophora ferox* and *Psorophora albipes* mosquitoes are thought to be the main vectors of UNAV[17,18]. The MAYV enzootic cycle is also known to involve non-human primates as amplification hosts[16,19].

In June 2017, a fatal MADV infection was confirmed in the Mogue community in Darien, the most eastern province of Panama, prompting field investigations. Here, we use seroprevalence data collected during this survey to determine population exposure and to characterize factors associated with sero-prevalence for MADV and other alphaviruses. By combining seroprevalence survey data from 2012 with that from the recent survey, we also attempted to determine whether alphaviruses emerged recently or were present historically.

## Materials and methods

We reconstructed the epidemiological dynamics of MADV and VEEV using data from cross-sectional surveys undertaken in 2012 and 2017 in Darien Province villages (Figure1). We also identified factors associated with alphavirus exposure, measured as IgG seroprevalence. Maps were constructed using the GPS coordinates collected during the investigation using ArcGIS package online version (Argis Solutions, Inc, Denver, Colorado). Land use shapes were validated by the Ministry of Environment (<https://www.miambiente.gob.pa>)

### 2012 Sero-survey

The original 2012 study was conducted by the Gorgas Memorial Institute of Health Studies (GMI) to estimate prevalence and to identify risk factors for zoonotic diseases in Panama[8]. The study included five villages (Figure 1). A total of 897 participants was surveyed but only 774 sera were available for laboratory testing. In Tamarindo, 176 participants were surveyed; 167 in Aruza, 250 in El Real; 130 in Mercadeo; and 174 in Pijibasal/Pirre1-2. All available samples were tested to detect neutralising antibodies against MADV and VEEV using a plaque reduction neutralization test (PRNT). Details of this survey have been described previously[8]. Specific characteristics of the study sites are given in the Supplementary Materials.

### 2017 Sero-survey

On June 30, 2017, a fatal human MADV case was confirmed with viral isolation in Mogue village (Figure 1). This was followed by a collaborative initiative between the Panamanian Ministry of Health and the GMI for outbreak investigation and response. From July 18-22, 2017, 83.3% of inhabitants (250 of 300) were surveyed, including members from all households. Each participant was interviewed using a standardized epidemiological form to record occupation, activities, livestock and crop holdings. Other details are given in the Supplementary Materials and Figure S1. Human sera collected in 2017 were tested using alphavirus genus-specific RT-PCR[20] and by enzyme-linked immunosorbent assays (ELISAs) to detect IgM and IgG antibodies against MADV and VEEV. Positive sera were then confirmed using PRNT with the same method as in the 2012 sero-survey[8]. ELISA antigens were prepared from EEEV- (prepared by Robert Shope at the Yale Arbovirus Research Unit in August 1989) and VEE complex virus (strain 78V-3531)-infected mouse brain. For PRNT, we used chimeric SINV/MADV — shown to be an accurate surrogate for MADV in these assays[21] — and VEEV vaccine strain TC83. In addition, sera were tested for MAYV, UNAV and CHIKV by PRNT using wild type strains (MAYV ARV 0565, UNAV-BT-1495-3 and CHIKV-256899). PRNT80 was positive to more than one virus at a titer of  $\geq 1:20$  and there was less than a 4-fold difference in titers.

### Mosquito collection and testing in 2017

Mosquitoes were collected during two consecutive days in Mogue from July 19 to 21 using ten traps: five CDC light traps were baited with octanol, and five Trinidad Traps were baited with laboratory mice. Traps were placed outdoors in peridomestic areas at the edge of the

vegetation, from 18:00 to 06:00. Trapped mosquitoes were collected early in the morning and placed in cryovials for storage in liquid nitrogen and transportation to the GMI. Mosquitoes were maintained cold, sorted to species level using taxonomic keys [22] and grouped into pools of 20 individuals.

Mosquito pools were homogenized in 2 mL of minimum essential medium supplemented with penicillin and streptomycin, and 20% fetal bovine serum using a TissueLyser (Qiagen, Hidden, Germany). After centrifugation of 12000 rpm for 10 mins, 200 µL of the supernatant were inoculated in each of two 12.5-cm<sup>2</sup> flasks of Vero cells. Samples were passaged twice for cytopathic effect (CPE) confirmation. The original mosquito suspensions were used for RNA extraction and tested using alphavirus genus-specific RT-PCR[20].

## Statistical methods

### Associated symptoms and risk factors analysis

We conducted separate analyses for MADV, VEEV and UNAV; in each case, the outcome variable was the presence/absence of antibodies against the virus, as determined by a PRNT<sub>80</sub> titre ≥ 1:20. The associations between each outcome and self-reported symptoms in the last two weeks were tested using chi-squared and Fisher exact tests; p< 0.05 was considered significant. The associations between each outcome and independent variables were estimated using generalized estimating equations for logistic regression models[23] and were expressed as Odds Ratios (ORs). The most parsimonious model was obtained with log Likelihood Ratio Test (LRT) variable selection[24]. Univariable and multivariable ORs were calculated with 95% confidence intervals.

### Force-of Infection Analysis

To investigate the endemicity and/or recent emergence of three alphaviruses (VEEV, MADV and UNAV), we combined age-structured sero-prevalence data from both surveys (i.e. from 2012[8] and 2017), which encompassed seven sites (Pirre1-2 & Pijibasal, Mercadeo Tamarindo, El Real, Aruza and Mogue) where either human or equine cases of VEEV or MADV have occasionally been reported. See Figure 1 and supplementary materials for a detailed description of these sites.

The historical force-of-infection (FOI) was estimated using a catalytic model[25], where the number of seropositive individuals in each sample was modelled using a binomial distribution,

$$n(a,t) \sim B(N, P(a,t))$$

Here  $n(a,t)$  is the number of seropositive individuals and  $P(a,t)$  is the underlying seroprevalence; in both cases,  $a$  denotes age and  $t$  denotes time;  $N$  is sample size. By making assumptions about  $P(a,t)$  (described below), we tested whether MADV, VEEV and UNAV transmission rate has historically been constant over time ("constant FOI" model) or

has varied— for example, due to recent introduction of these viruses (“time-varying FOI” model).

For a constant FOI ( $\lambda$ ), we modelled sero-prevalence for age  $a$  in year  $t$  (i.e. the time when the sero-survey occurred) as,

$$P(a, t) = 1 - \exp(-\lambda a).$$

For a time-varying FOI ( $\lambda_t$ ), we modelled sero-prevalence for age  $a$  as,

$$P(a, t) = 1 - \exp\left(-\sum_{i=t-a+1}^t \lambda_i\right)$$

In this framework, we assume no sero-reversion (loss of antibodies over time), no age dependence in susceptibility or exposure [26], and that mortality rate of infected individuals is the same as for susceptible individuals. The models were estimated in a Bayesian framework using Stan’s No-U-Turn Sampler [27,28]. Details of priors and model simulations and packages used are provided in Supplementary Materials. Median of the posteriors distribution of the parameters and their corresponding 95% Credible Intervals (95%CrI) are presented.

## Ethics

The outbreak investigation was undertaken during a public health outbreak response and Ethical approval for use of surveillance data and cross-sectional surveys was given by the GMI Ethics Committee (IRB # 0277/CBI/ICGES/15 and IRB # 047/CNBI/ICGES/11). The written informed consent of participants was obtained. All identifying information of participants was removed and confidentiality was strictly respected. The animal component of this study was approved by the GMI Committee of Care and Use of Animals (001/05 CIUCAL / ICGES, July 4, 2005), and conducted in accordance with Law number 23 of January 15, 1997 (Animal Welfare Guarantee) of the Republic of Panama.

## RESULTS

### Characteristics of the study population

In 2017, 250 participants belonging to 59 houses were surveyed, with complete risk factor data available for only 243 individuals (97.2%). Ages ranged from 1–97 years, and females comprised 51% of surveyed individuals. Further characteristics of the surveyed population are given in Table 1.

In 2012, a total of 826 participants was surveyed, but only 774 sera were available for laboratory testing. The risk factors determined from this sero-survey have previously been published [8].

### **Alphavirus detection and seroprevalence in 2012 and 2017**

In 2012, the overall neutralising antibody seroprevalence was 4.8% (95% CI: 3.4-6.5%) for MADV, and 31.6% (95% CI: 28.3-35.0%) for VEEV.

In 2017, the overall neutralising antibody seroprevalence was: MADV: 13.2% (95% CI 9.2-18.0%); VEEV: 16.8% (95% CI 12.4-22.0%); UNAV: 16.0% (95% CI 11.7-21.1%); and MAYV: 1.2% (95% CI 0.3-3.5%). No evidence of CHIKV infection was found. Neutralising antibody seroprevalence to more than one virus were observed in 3.6% (95% CI 1.6-6.7%) of participants. The proportion of subjects with both MADV and VEEV antibodies was 3.7% (df= 1; Pearson  $\chi^2$ = 3.43; test for independence  $P$ = 0.064); both UNAV and VEEV antibodies 3.7% (df=1; Pearson  $\chi^2$ =0.91; test for independence  $P$ =0.340) and both MADV and UNAV antibodies 2.9% (df=1; Pearson  $\chi^2$ = 0.97; test for independence  $P$ = 0.325). Only one subject presented antibodies against these three viruses. IgM prevalence was: MADV 1.6% (95% CI 0.4-4.2%); and VEEV 4.4% (95% CI 2.2-7.8%). Concurrent MADV and VEEV IgM was observed in 0.8% of individuals (95% CI 0.1-2.9%). Viral RNA was not detected in sera.

### **Associated symptoms and risk factors**

Exposure to MADV was significantly associated with self-reported dizziness, fatigue, depression, and difficulty cooking. Having VEEV neutralising antibodies was associated with dizziness and insomnia (Table 2). Participants over 11 years of age were more likely to test positive for UNAV antibodies, with those over 30 years of age being the most likely (Tables 3 and 4). Having a house with walls reduced the risk of testing positive for UNAV antibodies (Tables 3 and 4). The most parsimonious multivariable model revealed that being older and having vegetation around the house were positively associated with MADV antibody prevalence (Table 4). Washing clothes in ravines or rivers was also positively associated with VEEV antibodies in the multivariable model (Table 4).

### **Enzootic vectors**

In 2017, a total of 113 mosquitoes across ten species was collected: *Culex (Culex) coronator* (36.3%), *Cx. (Melanoconion) pedroi* (14.2%), *Cx. (Mel.) spissipes* (10.6%), *Cx. (Cx.) nigripalpus* (10.6%), *Cx. (Mel.) vomerifer* (8.8%), *Cx. (Cx.) declarator* (5.3%), *Cx. (Mel.) adamesi* (2.7%), *Cx. (Mel.) dunni* (2.7%). The overall mean number of females per trap-night was 6.7 in the Trinidad traps compared with 4.6 in the CDC traps. No viruses were detected in samples from mosquitoes.

### **Alphavirus Force-of-Infection**

For each virus, we fit both constant and time-varying FOI models to the seroprevalence data (see Methods) to describe the per capita rate at which susceptible individuals become



infected per year. Since the constant FOI model is effectively nested within the time-varying FOI model, we report on whether the latter model improved the fit relative to the former.

Our results indicate temporal and geographic heterogeneity in the human population's exposure to MADV (Figure 2), VEEV (Figure 3) and UNAV (Figure 4). The highest estimated sero-prevalence of each of the three viruses in under-10-year-olds (an indirect metric of recent transmission) were estimated for VEEV in Pirre 1-2 & Pijibasal at a posterior median of 44.8% (95%CrI: 34.9-55.0%) , followed by UNAV in Mogue at 5.6% (95%CrI: 4.1 – 7.5) and by MADV in Aruza at 4.7% (95%CrI: 3.2-6.7%).

For MADV, in six of the seven locations, there was no evidence of time-varying transmission (Table 5); but in one location, Aruza, FOI was estimated as 0.012 (CrI95% 0.006 – 0.021) (Figure 2A) in the latest decade analyzed (2002-2012) —a multiple of 4.6 and 5.3 times (ratio of posterior medians) the values estimated for 1992-2012 and 1982-1992, respectively (Figure 2B).

For VEEV, in six of the seven locations, there was no statistical support for time-varying transmission (Table 5). For the constant model, we estimated an annual FOI of 0.08 (95%CrI, 0.06 – 0.11) for VEEV in Pirre 1-2 & Pijibasal corresponding, to seroprevalence reaching 75% in 15-year-olds and almost 100% by 60 years of age (Figure 3A). However, from the relatively small sample (only 75 subjects), it is unclear whether these results are due to consistently high endemic transmission or recent introductions and/or recent outbreaks. For one location, Mercadeo, a time-varying FOI model fit the data best. In this case, FOI in the most recently analyzed decade (2002-2012) was estimated at 0.04 (95%CrI: 0.03 – 0.06) — an increase of 1.5 times (ratio of posterior medians) over the previous decade (1992-2012) and 3.1 times that of 1972-1992 (Figure 3B).

For UNAV, only tested in Mogue, a constant model fit the data best with a FOI estimated at 0.008 (95% CrI: 0.006-0.011) (Figure 4).

## Discussion

By analyzing data from recent cross-sectional seroprevalence studies, we reconstructed alphavirus transmission in eastern Panama. Historical transmission rates indicated endemic transmission of VEEV, MADV and UNAV in humans with increased human exposure during the past decade. Here, we show evidence of acute IgM antibody responses against MADV and VEEV in people without signs of neurologic disease, suggesting asymptomatic infections or mild disease. To our knowledge, this is the first evidence of human infection with UNAV in Panama, even though its circulation was reported during the 1960s in mosquitoes (*Psorophora ferox* and *Ps. albipes*) collected in western Panama[17]. Our results also demonstrate the highest seroprevalence of UNAV reported in Latin America[15,29].



Using catalytic FOI models fit to age-stratified seroprevalence data, we reconstructed 50 years of historical transmission rates for VEEV and MADV for seven locations in Darien Province. In most locations, the data indicated consistent endemic transmission of these viruses. In two locations – Mercadeo (for VEEV) and Aruza (for MADV) — there was evidence of a recent increase in human exposure. These results suggest that MADV and VEEV incidence differ geographically. The observed FOI profile suggest that VEEV infections increased in Pirre 1-2 & Pijibasal and Mercadeo, locations surrounded by tropical forest, while MADV infections increased mostly in Aruza, a formerly forested area converted to agricultural land over 30 years ago [30]. Although ecological changes could be associated with the increased exposure to MADV in Aruza, it is unclear which drivers could also explain the simultaneous rise in VEEV we estimated.

Only 3.6% of participants had antibodies to more than one alphavirus. Mixed alphavirus antibody responses in Peru[5] and Panama[8] suggest cross-protective immunity. However, the mechanism of cross-protection and whether some alphaviruses induce a stronger heterologous response than others remain unclear.

The MADV seroprevalence in 2017 was greater for those living with vegetation around the house, contrasting with previous evidence in 2012, suggesting possible change in exposure risk[8]. However, characteristics of houses in Mogue in 2017 may differ from areas that were surveyed in 2012[8]. Potential MADV vectors within the *Culex (Melanoconion)* subgenus[31] were found during our peridomestic investigation in Mogue. This finding of vectors near houses with surrounding vegetation as a risk factor supports the hypothesis that MADV infections can occur near houses. This contrasts with VEEV risk factors, which include washing clothes in ravines or rivers, suggesting that VEEV seropositivity is associated with human incursion into the gallery forest, a potential natural habitat for development of larvae of the main vectors *Culex (Melanoconion)* spp[31].

Having a house with walls was associated with lower UNAV sero-prevalence in Mogue. This suggests that UNAV infections can also occur outside of the forest, where the main vector *Ps. ferox* and non-human primates are believed to maintain the enzootic cycle[16,17,19]. *Psorophora* spp. have been also found in disturbed areas of Panama[32], indicating potential changes in the vector habitat usage.

Alphaviral exposure was associated with several self-reported neurological and constitutional sequelae. Specifically, weakness, insomnia, depression and dizziness were commonly associated with prior MADV, VEEV, and UNAV exposure. Depression and other neurological symptoms have also been observed after neurotropic flavivirus infections in North America[33]. However, the role of several alphaviruses in long-term neurological impairment is still unknown. This highlights the need to further investigate the long term ramifications of alphaviral infection with objective testing (e.g. neuropsychological testing, imaging).

1 Alphaviral RNA was not detected in samples from either humans or mosquitoes, even  
2 though field surveys and collection were performed soon after the confirmation of a fatal  
3 MADV infection in the community. Although sample size is always a limiting factor in  
4 attempts to identify ongoing infections, these results suggest that these alphaviruses may  
5 be short-lived peripherally, or produce low viremia[7]. Low MAYV sero-prevalence was also  
6 detected in our earlier research[7], indicating little human exposure to this virus in Panama.

7  
8 Our study has several limitations. Clinical outcomes statistically associated to exposure to  
9 these alphaviruses represent exploratory, and causal inference studies that should be  
10 followed up with more comprehensive assessments. Our study only obtained preliminary  
11 data during an outbreak response to generate hypotheses. Although mosquito collections  
12 were only performed over two days, and the number of collected mosquitos does not allow  
13 us to draw conclusions about active viral circulation. The collection of few mosquitos  
14 vectors near houses suggest close contact between vectors and humans. The use of both  
15 CDC traps baited with octanol and Trinidad traps enhanced our ability to captured  
16 alphavirus enzootic vectors [34]. The sample size used in these sero-surveys only allowed  
17 us to describe general trends in the force-of-infection over time. Also, we cannot exclude  
18 cross-reactivity or age-dependency in exposure or susceptibility. More precise estimates  
19 would require an increased sample size and, ideally, longitudinal data collection.

20  
21 In summary, we investigated alphavirus transmission in Panama using age-specific  
22 seroprevalence data to look back over five decades . Our results suggest that human  
23 alphavirus infections may have gone undetected by the Panamanian surveillance system,  
24 and hint that the MADV and VEEV outbreaks in 2010 may have been due to a common  
25 increase in enzootic circulation. The antibody seroprevalence we determined for UNAV is  
26 the highest reported in Latin America. Taken together, these results coupled with potential  
27 symptoms of MADV and VEEV infection underscore the importance of developing  
28 comprehensive arboviral surveillance in Latin American enzootic regions.

## Supporting Information Legends

1. **Supporting information file 1.** S1. Includes detailed information on the study sites, equations, figures and references of the manuscript.
2. **Supporting information file 2.** S2 Checklist: STROBE Checklist

## Acknowledgments

We thank the people from the Mogue community for cooperation and hospitality during our investigation as well as Patricia Aguilar for technical suggestions and support with reagents. We also thank Mileyka Santos for mosquito identification; Isela Guerrero, Jose Francisco Galue, Marisin Tenernorio and Daniel Castillo for technical support with the RT-PCR and ELISAs testing; Sandra Lopez-Verges, for provided reagents and revision of the manuscript. JMP, BA and AV are members of the Sistema Nacional de Investigación (SNI), Panama.

**Financial support.** JPC is funded by the Clarendon Scholarship from University of Oxford and Lincoln-Kingsgate Scholarship from Lincoln College, University of Oxford [grant number SFF1920\_CB2\_MPLS\_1293647]. This work was supported by SENACYT [grant number FID-16-201] grant to JPC and AV. Also, the Neglected Diseases Grant from the Ministry of Economy and Finance of Panama to JMP [grant number 1.11.1.3.703.01.55.120]. BA received support from the Panamanian Ministry of Economy and Finance and the Panamanian Ministry of Health [grant number 06- 2012-FPI-MEF/056-2012-MINSA]. SCW is supported by the U.S. National Institutes of Health [grant number R24AI120942]. ZMC and CAD acknowledge joint Centre funding from the UK Medical Research Council and Department for International Development [grant number MR/R015600/1]. ZMC is funded by the MRC Rutherford Fund Fellowship [grant number MR/R024855/1]. CAD acknowledge funding some the National Institute of Health Research for support of the Health Protection Research Unit in Modelling Methodology.

**Disclaimers.** The opinions expressed by authors contributing to this journal do not necessarily reflect the opinions of the Gorgas Memorial Institute of Health Studies, The Panamanian Government, or the institutions with which the authors are affiliated.

**Potential conflicts of interest.** All Authors: No reported conflicts of interest. Conflicts that the editor consider relevant to the content have been disclosed.

## References

1. Navarro J-C, Carrera J-P, Liria J, Auguste AJ, Weaver SC. Alphaviruses in Latin America and the Introduction of Chikungunya Virus. *Human Virology in Latin America*. Cham: Springer International Publishing; 2017. pp. 169–192. doi:10.1007/978-3-319-54567-7\_9
2. Weaver SC, Salas R, Rico-Hesse R, Ludwig G V, Oberste MS, Boshell J, et al. Re-emergence of epidemic Venezuelan equine encephalomyelitis in South America. *Lancet*. 1996;348: 436–440. doi:10.1016/S0140-6736(96)02275-1
3. Borgherini G, Poubeau P, Staikowsky F, Lory M, Le Moullec N, Becquart JP, et al. Outbreak of chikungunya on Reunion Island: early clinical and laboratory features in 157 adult patients. *Clin Infect Dis*. 2007;44: 1401–1407. doi:10.1086/517537
4. Arrigo NC, Adams AP, Weaver SC. Evolutionary patterns of eastern equine encephalitis virus in North versus South America suggest ecological differences and taxonomic revision. *J Virol*. 2010;84: 1014–1025.
5. Aguilar P V., Robich RM, Turell MJ, O’Guinn ML, Klein TA, Huaman A, et al. Endemic eastern equine encephalitis in the Amazon region of Peru. *Am J Trop Med Hyg*. 2007;76: 293–298.
6. Carrera J-P, Forrester N, Wang E, Vittor AY, Haddow AD, López-Vergès S, et al. Eastern equine encephalitis in Latin America. *N Engl J Med*. 2013;369. doi:10.1056/NEJMoa1212628
7. Carrera J-P, Bagamian KH, Sosa N, Armien B, Travassos da Rosa AP, Arroyo G, et al. Human and Equine Infection with Alphaviruses and Flaviviruses in Panamá during 2010: A Cross-Sectional Study of Household Contacts during an Encephalitis Outbreak. *Am J Trop Med Hyg*. 2018;98: 1798–1804. doi:10.4269/ajtmh.17-0679
8. Vittor AY, Armien B, Gonzalez P, Carrera J-P, Dominguez C, Valderrama A, et al. Epidemiology of Emergent Madariaga Encephalitis in a Region with Endemic Venezuelan Equine Encephalitis: Initial Host Studies and Human Cross-Sectional Study in Darien, Panama. *PLoS Negl Trop Dis*. 2016;10. doi:10.1371/journal.pntd.0004554
9. Weaver SC, Salas R, Rico-Hesse R, Ludwig G V, Oberste MS, Boshell J, et al. Re-emergence of epidemic Venezuelan equine encephalomyelitis in South America. VEE Study Group. *Lancet*. 1996;348: 436–40. doi:10.1016/S0140-6736(96)02275-1
10. Aguilar P V, Estrada-Franco JG, Navarro-Lopez R, Ferro C, Haddow AD, Weaver SC. Endemic Venezuelan equine encephalitis in the Americas: hidden under the dengue umbrella. *Future Virology*. 2011. pp. 721–740.
11. Greene IP, Paessler S, Austgen L, Anishchenko M, Brault AC, Bowen RA, et al. Envelope Glycoprotein Mutations Mediate Equine Amplification and Virulence of Epizootic Venezuelan Equine Encephalitis Virus Envelope Glycoprotein Mutations Mediate Equine Amplification and Virulence of Epizootic Venezuelan Equine Encephalitis Virus. 2005;79: 9128–9133. doi:10.1128/JVI.79.14.9128
12. Auguste AJ, Liria J, Forrester NL, Giambalvo D, Moncada M, Long KC, et al. Evolutionary and Ecological Characterization of Mayaro Virus Strains Isolated during

- an Outbreak, Venezuela, 2010. *Emerg Infect Dis.* 2015;21: 1742–1750.  
doi:10.3201/eid2110.141660
13. Lednicky J, Beau De Rochars VM, Elbadry M, Loeb J, Telisma T, Chavannes S, et al. Mayaro virus in child with acute febrile illness, Haiti, 2015. *Emerg Infect Dis.* 2016;22: 2000–2002. doi:10.3201/eid2211.161015
14. Marta S. Sabattini; Robert E. Shope; José M. Vanella. Serological survey for Arboviruses in Cordoba Province, Argentina. *Am J Trop Med Hyg.* 1965;14: 1073–1078.
15. Cardozo F, Konigheim B, Albrieu-Llinás G, Rivarola ME, Aguilar J, Rojas A, et al. Alphaviruses: Serological Evidence of Human Infection in Paraguay (2012–2013). *Vector-Borne Zoonotic Dis.* 2018;10: 266–272. doi:10.1089/vbz.2017.2178
16. Powers AM, Aguilar P V., Chandler LJ, Brault AC, Meakins TA, Watts D, et al. Genetic relationships among Mayaro and UNA virus suggest distinct patterns of transmission. *Am J Hum Biol.* 2006;75: 461–469. doi:10.1002/ajhb.10111 [pii]
17. Galindo P, Srihongse S, De Rodaniche E, Grayson MA. An ecological survey for arboviruses in Almirante, Panama, 1959–1962. *Am J Trop Med Hyg.* 1966;15: 385–400. doi:10.4269/ajtmh.1966.15.385
18. Walder R, Suarez OM, Calisher CH. Arbovirus studies in southwestern Venezuela during 1973–1981. II. Isolations and further studies of Venezuelan and eastern equine encephalitis, Una, Itaqui, and Moju viruses. *Am J Trop Med Hyg.* 1984;33: 483–491. doi:10.4269/ajtmh.1984.33.483
19. Díaz LA, del Pilar Díaz M, Almirón WR, Contigiani MS. Infection by UNA virus (Alphavirus; Togaviridae) and risk factor analysis in black howler monkeys (*Alouatta caraya*) from Paraguay and Argentina. *Trans R Soc Trop Med Hyg.* 2007;101: 1039–1041. doi:10.1016/j.trstmh.2007.04.009
20. Sánchez-Seco MP, Rosario D, Quiroz E, Guzmán G, Tenorio A. A generic nested-RT-PCR followed by sequencing for detection and identification of members of the alphavirus genus. *J Virol Methods.* 2001;95: 153–161. doi:10.1016/S0166-0934(01)00306-8
21. Johnson BW, Kosoy O, Wang E, Delorey M, Russell B, Bowen RA, et al. Use of Sindbis/equine encephalitis chimeric viruses in plaque reduction neutralization tests for arboviral disease diagnostics. *Clin Vaccine Immunol.* 2011;18: 1486–1491. doi:10.1128/CVI.05129-11
22. Brown B V., Borkent A, Cumming JM, Wood DM, Woodley N, Zumbado MA. *Manual of Central American Diptera: Volume 2.* National Research Council of Canada. 2010. doi:10.3897/zookeys.52.541
23. Hanley JA. Statistical Analysis of Correlated Data Using Generalized Estimating Equations: An Orientation. *Am J Epidemiol.* 2003;157: 364–375. doi:10.1093/aje/kwf215
24. Vuong QH. Likelihood Ratio Tests for Model Selection and Non-Nested Hypotheses. *Econometrica.* 1989;57: 307. doi:10.2307/1912557
25. Muench H. *Catalytic models in epidemiology.* Harvard University Press; 1959.
26. Salje H, Cauchemez S, Alera MT, Rodriguez-Barraquer I, Thaisomboonsuk B, Srikiatkachorn A, et al. Reconstruction of 60 years of chikungunya epidemiology in

- 1 the philippines demonstrates episodic and focal transmission. J Infect Dis. 2016;213:  
2 604–610. doi:10.1093/infdis/jiv470
- 3 27. Carpenter B, Gelman A, Hoffman MD, Lee D, Goodrich B, Betancourt M, et al. Stan :  
4 A Probabilistic Programming Language. J Stat Softw. 2017;76.  
5 doi:10.18637/jss.v076.i01
- 6 28. Lambert B. A student’s guide to Bayesian statistics. London: SAGE Publications Ltd.;  
7 2018.
- 8 29. Diaz LA, Spinsanti LI, Almiron WR, Contigiani MS. Una virus: First report of human  
9 infection in Argentina. Rev Inst Med Trop Sao Paulo. 2003;45: 109–110.  
10 doi:10.1590/S0036-46652003000200012
- 11 30. Reymondin L, Argote K, Navarrete C, Castro AC. Inter-American Development Bank  
12 Environmental Road Impact Assessment Using Remote Sensing Methodology for  
13 Monitoring Land-Use Change in Latin America : Results of Five Case Studies Louis  
14 Reymondin Karolina Argote Andy Jarvis Carolina Navarrete Alejandro C [Internet].  
15 2013. doi:10.13140/RG.2.1.3314.6721
- 16 31. Blosser EM, Burkett-Cadena ND. Oviposition Strategies of Florida culex  
17 (Melanoconion) mosquitoes. J Med Entomol. 2017;54: 812–820.  
18 doi:10.1093/jme/tjx052
- 19 32. Loaiza JR, Dutari LC, Rovira JR, Sanjur OI, Laporta GZ, Pecor J, et al. Disturbance and  
20 mosquito diversity in the lowland tropical rainforest of central Panama. Sci Rep.  
21 2017;7: 1–13. doi:10.1038/s41598-017-07476-2
- 22 33. Greve KW, Houston RJ, Adams D, Stanford MS, Bianchini KJ, Clancy A, et al. The  
23 neurobehavioural consequences of St. Louis encephalitis infection. Brain Inj.  
24 2002;16: 917–927. doi:10.1080/02699050210131920
- 25 34. Ferro C, Boshell J, Moncayo AC, Gonzalez M, Ahumada ML, Kang W, et al. Natural  
26 enzootic vectors of Venezuelan equine encephalitis virus, Magdalena Valley,  
27 Colombia. Emerg Infect Dis. 2003;9: 49–54. doi:10.3201/eid0901.020136
- 28

Table 1. Characteristics of the 243 study participants with complete data from the 2017 survey

| Characteristic                       | N (%)      |
|--------------------------------------|------------|
| Sex                                  |            |
| Male                                 | 120 (49.4) |
| Female                               | 123 (50.6) |
| Ages (years)                         |            |
| 2 – 11                               | 80 (32.9)  |
| 12 - 30                              | 82 (33.7)  |
| ≥31                                  | 81 (33.3)  |
| House members                        | 10 (4.1)   |
| Activities                           |            |
| Main occupation                      |            |
| Student                              | 122 (50.2) |
| Farmer/Rancher                       | 48 (19.8)  |
| Homemaker/Occupation at home         | 73 (30.0)  |
| Breeding poultry                     | 45 (18.5)  |
| Fishing for consumption              | 7 (2.9)    |
| Contact with pastures                | 78 (32.1)  |
| Contact with crops                   | 123 (50.6) |
| Clearing vegetation                  | 80 (32.9)  |
| Working in agriculture               | 86 (35.4)  |
| Working in pastures                  | 24 (9.9)   |
| Working in grain deposits            | 21 (8.6)   |
| Working in sawmills/forest           | 33 (13.6)  |
| Working in chicken coops             | 58 (23.9)  |
| Working in pigsties                  | 44 (18.1)  |
| Washing clothes in ravines or rivers | 111 (45.7) |
| Taking baths in natural water source | 211 (86.8) |
| House-level features                 |            |
| Total houses                         | 59         |
| House floor material                 |            |
| Wood                                 | 55 (93.2)  |
| Other                                | 4 (6.8)    |
| House with walls                     | 29 (49.2)  |
| House window material                |            |
| Concrete (ornamental blocks)         | 42 (71.2)  |
| Wood                                 | 17 (28.8)  |
| Roof material house                  |            |
| Tin roof                             | 28 (47.5)  |
| Straw thatched                       | 31 (52.5)  |
| Vegetation around the house          | 25 (42.4)  |
| Rice cultivation around the house    | 4 (6.8)    |
| Corn cultivation around the house    | 3 (5.1)    |
| Waste disposal methods               |            |
| Burying                              | 5 (8.5)    |
| Burning                              | 43 (72.9)  |
| Other                                | 11 (18.6)  |
| Rain water                           | 57 (96.6)  |

\* range

bioRxiv preprint doi: <https://doi.org/10.1101/2020.01.10.301462>; this version posted January 10, 2020. The copyright holder for this preprint (which was not certified by peer review) is the author/funder, who has granted bioRxiv a license to display the preprint in perpetuity. It is made available under aCC-BY 4.0 International license.

1  
2  
3  
4  
5  
6  
7  
8



**Table 2.** Symptoms and signs associated with UNAV, MADV and VEEV exposure (neutralising antibodies)

| Symptoms                      |            | UNAV+            |              | MADV+            |              | VEEV+            |              |
|-------------------------------|------------|------------------|--------------|------------------|--------------|------------------|--------------|
|                               | N (%)      | n(%)**           | ***P value   | n(%)**           | ***P value   | n(%)             | ***P value   |
| Fatigue                       | 85 (35.0)  | 14 (35.0)        | 0.998        | 15 (48.4)        | 0.094        | 19 (45.4)        | 0.125        |
| Difficulty with concentration | 60 (24.7)  | 13 (32.5)        | 0.210        | 10 (32.3)        | 0.296        | 11 (26.2)        | 0.804        |
| Memory loss                   | 58 (23.9)  | 12 (30.0)        | 0.320        | 11 (35.5)        | 0.104        | 13 (31.0)        | 0.236        |
| Confusion                     | 41 (16.9)  | 10 (25.0)        | 0.133        | 6 (19.4)         | 0.693        | 11 (26.2)        | 0.076        |
| Dizziness                     | 72 (29.6)  | <b>18 (45.0)</b> | <b>0.020</b> | 12 (38.7)        | 0.236        | <b>18 (42.9)</b> | <b>0.039</b> |
| Seizures                      | 5 (2.1)    | 2 (5.0)          | 0.191        | 2 (6.5)          | 0.123        | 2 (4.8)          | 0.207        |
| General weakness              | 65 (26.7)  | 15 (37.5)        | 0.093        | <b>13 (41.9)</b> | <b>0.041</b> | 13 (31.0)        | 0.499        |
| Paralysis                     | 11 (4.5)   | 3 (7.5)          | 0.396        | 1 (3.2)          | 1.000        | 4 (36.4)         | 0.102        |
| Difficulty ambulating         | 29 (11.9)  | 5 (12.5)         | 0.540        | 5 (16.1)         | 0.302        | 8 (19.1)         | 0.118        |
| Headache                      | 110 (45.3) | 22 (55.0)        | 0.176        | 15 (48.4)        | 0.709        | 21 (50.0)        | 0.498        |
| Insomnia                      | 33 (13.6)  | 3 (7.5)          | 0.313        | <b>9 (29.0)</b>  | <b>0.012</b> | <b>12 (28.6)</b> | <b>0.002</b> |
| Depression                    | 22 (9.1)   | 5 (12.5)         | 0.285        | <b>6 (19.4)</b>  | <b>0.044</b> | 2 (4.8)          | 0.228        |
| Irritability                  | 16 (6.6)   | 3 (7.5)          | 0.732        | 2 (6.5)          | 1.000        | 4(9.5)           | 0.490        |
| Difficulty cooking            | 23 (9.5)   | 5 (12.5)         | 0.473        | <b>6 (19.4)</b>  | <b>0.044</b> | 6 (14.3)         | 0.241        |
| Difficulty cleaning           | 28 (11.5)  | 5 (12.5)         | 0.832        | 6 (19.4)         | 0.144        | 5 (11.9)         | 0.932        |
| Difficulty working            | 25 (10.3)  | 3 (7.5)          | 0.776        | 6 (19.4)         | 0.075        | 6 (14.3)         | 0.348        |
| Fever                         | 6 (2.5)    | 1 (2.5)          | 1.000        | 0 (0.0)          | 1.000        | 1 (2.4)          | 0.173        |
| Chills                        | 2 (0.8)    | 1 (2.5)          | 0.303        | 0 (0.0)          | 1.000        | 0 (0.0)          | 1.000        |
| Emesis                        | 1 (0.4)    | 0 (0.0)          | 1.000        | 0 (0.0)          | 1.000        | 1 (2.4)          | 0.173        |
| Diarrhea                      | 1 (0.4)    | 0 (0.0)          | 1.000        | 0 (0.0)          | 1.000        | 1 (2.4)          | 0.173        |

n=40 with UNAV antibodies; n=31 with MADV antibodies; n=42 with VEEV antibodies n=243 participants in total\* Overall proportion of participants with symptoms \*\* Proportion of those with antibodies that reported symptoms \*\*\*results with p < 0.05 are shown in boldface type  
+based on PRNT results



1  
2  
3  
4  
5  
6

|                                      |                               |             |                    |                     |             |                    |                     |             |                    |                     |
|--------------------------------------|-------------------------------|-------------|--------------------|---------------------|-------------|--------------------|---------------------|-------------|--------------------|---------------------|
| Working in pigsties                  |                               | 1.27        | 0.58 - 2.73        | 0.545               | 2.20        | 0.98 - 4.93        | 0.054               | 1.13        | 0.53 - 2.44        | 0.750               |
|                                      |                               |             |                    |                     |             |                    |                     |             |                    |                     |
| Washing clothes in ravines or rivers |                               | 1.40        | 0.61 - 3.19        | 0.422               | 0.63        | 0.20 - 1.94        | 0.420               | 2.08        | 0.94 - 4.58        | <u>0.069</u>        |
|                                      |                               |             |                    |                     |             |                    |                     |             |                    |                     |
| Taking baths in natural water source |                               | 1.40        | 0.75 - 2.32        | 0.337               | 1.74        | 0.81 - 3.75        | 0.152               | <b>3.11</b> | <b>1.53 - 6.33</b> | <b><u>0.002</u></b> |
|                                      |                               |             |                    |                     |             |                    |                     |             |                    |                     |
| House level                          |                               | 1.08        | 0.39 - 3.04        | 0.871               | 2.34        | 0.53 -10.25        | 0.259               | 1.95        | 0.60 - 6.42        | 0.269               |
|                                      |                               |             |                    |                     |             |                    |                     |             |                    |                     |
| House with walls                     |                               |             |                    |                     |             |                    |                     |             |                    |                     |
|                                      |                               | <b>0.47</b> | <b>0.39 - 3.04</b> | <b><u>0.042</u></b> | 1.83        | 0.83 - 4.02        | 0.133               | 0.78        | 0.37 - 1.64        | 0.515               |
| House window material                |                               |             |                    |                     |             |                    |                     |             |                    |                     |
|                                      |                               |             |                    |                     |             |                    |                     |             |                    |                     |
|                                      | Concrete <sup>φ</sup><br>wood | Ref.        |                    |                     | Ref.        |                    |                     | Ref.        |                    |                     |
|                                      |                               | 0.68        | 0.28 - 1.66        | 0.397               | 0.59        | 0.20 - 1.74        | 0.341               | 0.89        | 0.37 - 2.15        | 0.799               |
| Roof material house                  |                               |             |                    |                     |             |                    |                     |             |                    |                     |
|                                      |                               |             |                    |                     |             |                    |                     |             |                    |                     |
|                                      | Tin roof<br>straw thatched    | Ref.        |                    |                     | Ref.        |                    |                     | Ref.        |                    |                     |
|                                      |                               | 0.93        | 0.47 - 1.86        | 0.853               | 1.61        | 0.72 - 3.63        | 0.249               | 1.42        | 0.68 - 2.59        | 0.349               |
| Vegetation around the house          |                               |             |                    |                     |             |                    |                     |             |                    |                     |
|                                      |                               | 0.64        | 0.31 - 1.35        | 0.245               | <b>2.94</b> | <b>1.24 - 5.26</b> | <b><u>0.006</u></b> | 1.18        | 0.56 - 2.49        | 0.653               |
| Waste disposal methods               |                               |             |                    |                     |             |                    |                     |             |                    |                     |
|                                      |                               |             |                    |                     |             |                    |                     |             |                    |                     |
|                                      | Burying                       | Ref.        |                    |                     | Ref.        | Ref.               |                     | Ref.        |                    |                     |
|                                      |                               | 1.21        | 0.42 - 3.54        | 0.721               | 0.23        | 0.03 - 2.02        | 0.189               | 1.20        | 0.37 - 3.87        | 0.755               |
|                                      | Other                         | 1.28        | 0.48 - 3.44        | 0.616               | 0.89        | 0.28 - 2.84        | 0.846               | 0.89        | 0.29 - 269         | 0.846               |

\*results with p < 0.05 are shown in boldface type

OR= Odds Ratio

\*\* based on PRNT results

φ ornamental blocks

1  
2  
3  
4

**Table 4.** Independent factors associated with the seroprevalence of UNAV, MADV and VEEV neutralising antibodies in multivariable generalized estimating equations for logistic regression models (n=243)

|                                      |         | UNAV*               |                     |                         | MADV*               |                     |                     | VEEV*               |                     |                     |
|--------------------------------------|---------|---------------------|---------------------|-------------------------|---------------------|---------------------|---------------------|---------------------|---------------------|---------------------|
|                                      |         | Multiple regression |                     |                         | Multiple regression |                     |                     | Multiple regression |                     |                     |
| Factors                              |         | OR                  | 95% CI              | **P value               | OR                  | 95% CI              | **P value           | OR                  | 95% CI              | **P value           |
| Age group (years)                    |         |                     |                     |                         |                     |                     |                     |                     |                     |                     |
|                                      | 2 - 11  | Ref.                |                     |                         | Ref.                |                     |                     | Ref.                |                     |                     |
|                                      | 12 - 30 | 2.39                | 0.70 - 8.15         | 0.164                   | <b>6.28</b>         | <b>1.27 - 31.00</b> | <b><u>0.024</u></b> | 1.83                | 0.61 - 5.53         | 0.279               |
|                                      | ≥31     | <b>9.98</b>         | <b>3.27 - 30.48</b> | <b><u>&lt;0.001</u></b> | 12.64               | 2.61 - 60.19        | <b><u>0.002</u></b> | 4.53                | <b>1.61 - 12.74</b> | <b><u>0.004</u></b> |
| House with walls                     |         |                     |                     |                         |                     |                     |                     |                     |                     |                     |
|                                      |         | <b>0.43</b>         | <b>0.20 - 0.94</b>  | <b><u>0.035</u></b>     |                     |                     |                     |                     |                     |                     |
| Washing clothes in ravines or rivers |         |                     |                     |                         |                     |                     |                     |                     |                     |                     |
|                                      |         |                     |                     |                         |                     |                     |                     | 2.65                | 1.24 - 5.63         | <b><u>0.011</u></b> |
| Vegetation around the house          |         |                     |                     |                         |                     |                     |                     |                     |                     |                     |
|                                      |         |                     |                     |                         | <b>2.96</b>         | <b>1.25 - 6.98</b>  | <b><u>0.013</u></b> |                     |                     |                     |

\* based on PRNT results  
\*\*results with P < 0.05 are shown in boldface type  
OR= Odds Ratio

5  
6  
7  
8

Table 5. Comparison of constant versus time-varying Force-of-Infection for UNAV, MADV and VEEV in 2012 and 2017

| Place              | Virus* | Sample size | Age classes | Constant FOI model |       | Time-varying FOI model |             | Comparison           |      |                         |
|--------------------|--------|-------------|-------------|--------------------|-------|------------------------|-------------|----------------------|------|-------------------------|
|                    |        |             |             | elpd               | se    | elpd                   | se          | elpd <sub>diff</sub> | se   | **p value               |
| Pirres & Pijibasal | MADV   | 74          | 11          | -4.98              | 1.92  | -5.43                  | 1.62        | -0.45                | 0.46 | 0.835                   |
| Mercadeo           | MADV   | 103         | 11          | -9.19              | 2.40  | -9.36                  | 2.09        | -0.17                | 0.50 | 0.634                   |
| Tamarindo          | MADV   | 176         | 11          | -6.33              | 2.85  | -6.78                  | 2.57        | -0.45                | 0.33 | 0.916                   |
| El Real            | MADV   | 251         | 11          | -3.48              | 1.90  | -3.55                  | 1.59        | -0.06                | 0.33 | 0.577                   |
| Aruza              | MADV   | 167         | 11          | -30.12             | 5.23  | <b>-24.27</b>          | <b>3.32</b> | 5.86                 | 2.10 | <b><u>0.003</u></b>     |
| Mogue              | MADV   | 243         | 11          | -20.92             | 3.16  | -21.26                 | 3.14        | -0.35                | 0.29 | 0.880                   |
|                    |        |             |             |                    |       |                        |             |                      |      |                         |
| Pirres & Pijibasal | VEEV   | 73          | 11          | -25.15             | 11.38 | -18.58                 | 7.08        | 6.56                 | 4.56 | 0.075                   |
| Mercadeo           | VEEV   | 103         | 11          | -26.07             | 2.32  | <b>-22.26</b>          | <b>2.31</b> | 3.81                 | 0.87 | <b><u>&lt;0.001</u></b> |
| Tamarindo          | VEEV   | 176         | 11          | -14.01             | 2.54  | -13.18                 | 2.37        | 0.83                 | 0.71 | 0.120                   |
| El Real            | VEEV   | 251         | 11          | -27.68             | 5.89  | -25.34                 | 4.23        | 2.35                 | 1.94 | 0.112                   |
| Aruza              | VEEV   | 167         | 11          | -20.98             | 1.87  | -20.98                 | 1.79        | 0.00                 | 0.40 | 0.503                   |
| Mogue              | VEEV   | 243         | 11          | -21.53             | 2.68  | -22.24                 | 2.80        | -0.70                | 0.36 | 0.976                   |
|                    |        |             |             |                    |       |                        |             |                      |      |                         |
| Mogue              | UNAV   | 243         | 11          | -17.84             | 1.78  | -18.63                 | 2.22        | -0.78                | 0.67 | 0.880                   |

elpd = expected log predictive density for an out-of-sample data point

se = standard error

elpd<sub>diff</sub> = difference in elpd between the two models

\* based on PRNT results

\*\* based on comparing z statistics with standard normal quantiles; results with P < 0.05 (shown in boldface) indicate the time-varying FOI model significantly outperformed the constant FOI model.

**Figure 1.** Map of the study sites in eastern Panama: **A**, the sampling sites in the Darien Province in Eastern Panama. **B**, Zoom-in projection of sampling sites on a land-use layer

**Figure 2.** Force-of-Infection (FOI) models fitted to MADV seroprevalence data. **A** (top panels), estimated constant (red) vs time-varying force-of-infection (blue) for MADV in eastern Panama over 50 years and **B** (bottom panels) fitted and observed seroprevalence. Red lines represent the estimated constant force-of-infection and blue lines the estimated time-varying force-of-Infection. In each case the shading represents 95% credible intervals from the model. The circles' radii in the lower panels indicates sample size in each 5-year age group and the vertical lines represent 95% confidence intervals for observed seroprevalence.

**Figure 3.** Force-of-Infection (FOI) models fitted to VEEV seroprevalence data. **A** (top panels), estimated constant (red) vs time-varying force-of-infection (blue) for VEEV in eastern Panama over 50 years and **B** (bottom panels) fitted and observed seroprevalence. Red lines represent the estimated constant force-of-infection and blue lines the estimated time-varying force-of-Infection. In each case the shading represents 95% credible intervals from the model. The circles' radii in the lower panels indicates sample size in each 5-year age group and the vertical lines represent 95% confidence intervals for observed seroprevalence.

**Figure 4.** Force-of-Infection (FOI) models fitted to UNAV seroprevalence data. **A** (top panels), estimated constant (red) vs time-varying force-of-infection (blue) for UNAV in eastern Panama over 50 years and **B** (bottom panels) fitted and observed seroprevalence. Red lines represent the estimated constant force-of-infection and blue lines the estimated time-varying force-of-Infection. In each case the shading represents 95% credible intervals from the model. The circles' radii in the lower panels indicates sample size in each 5-year age group and the vertical lines represent 95% confidence intervals for observed seroprevalence.

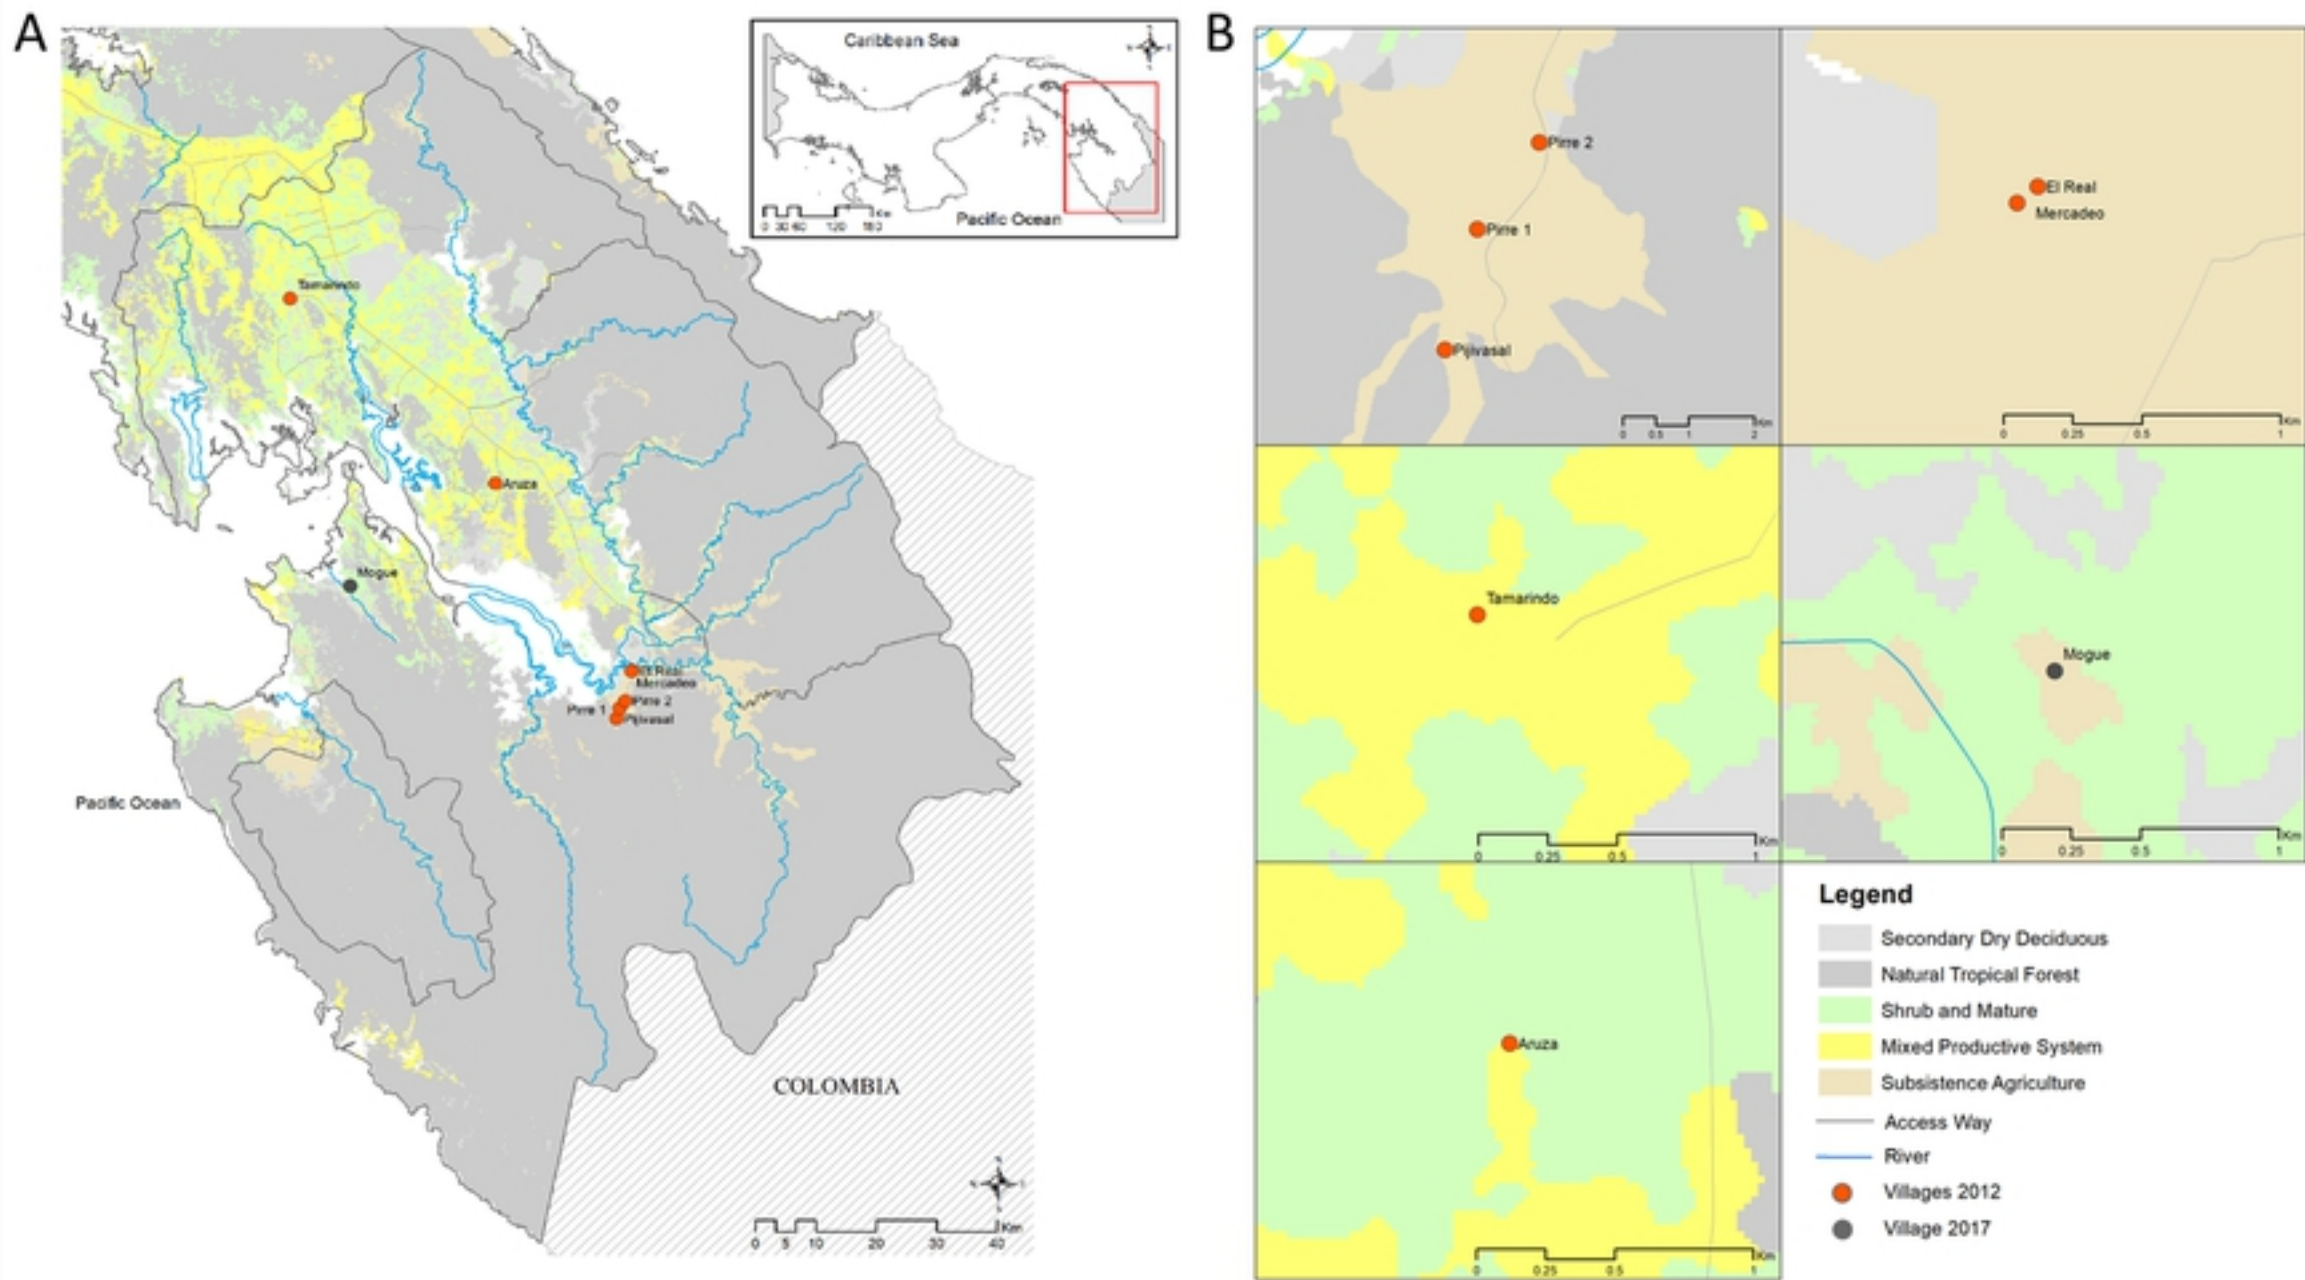

Figure1



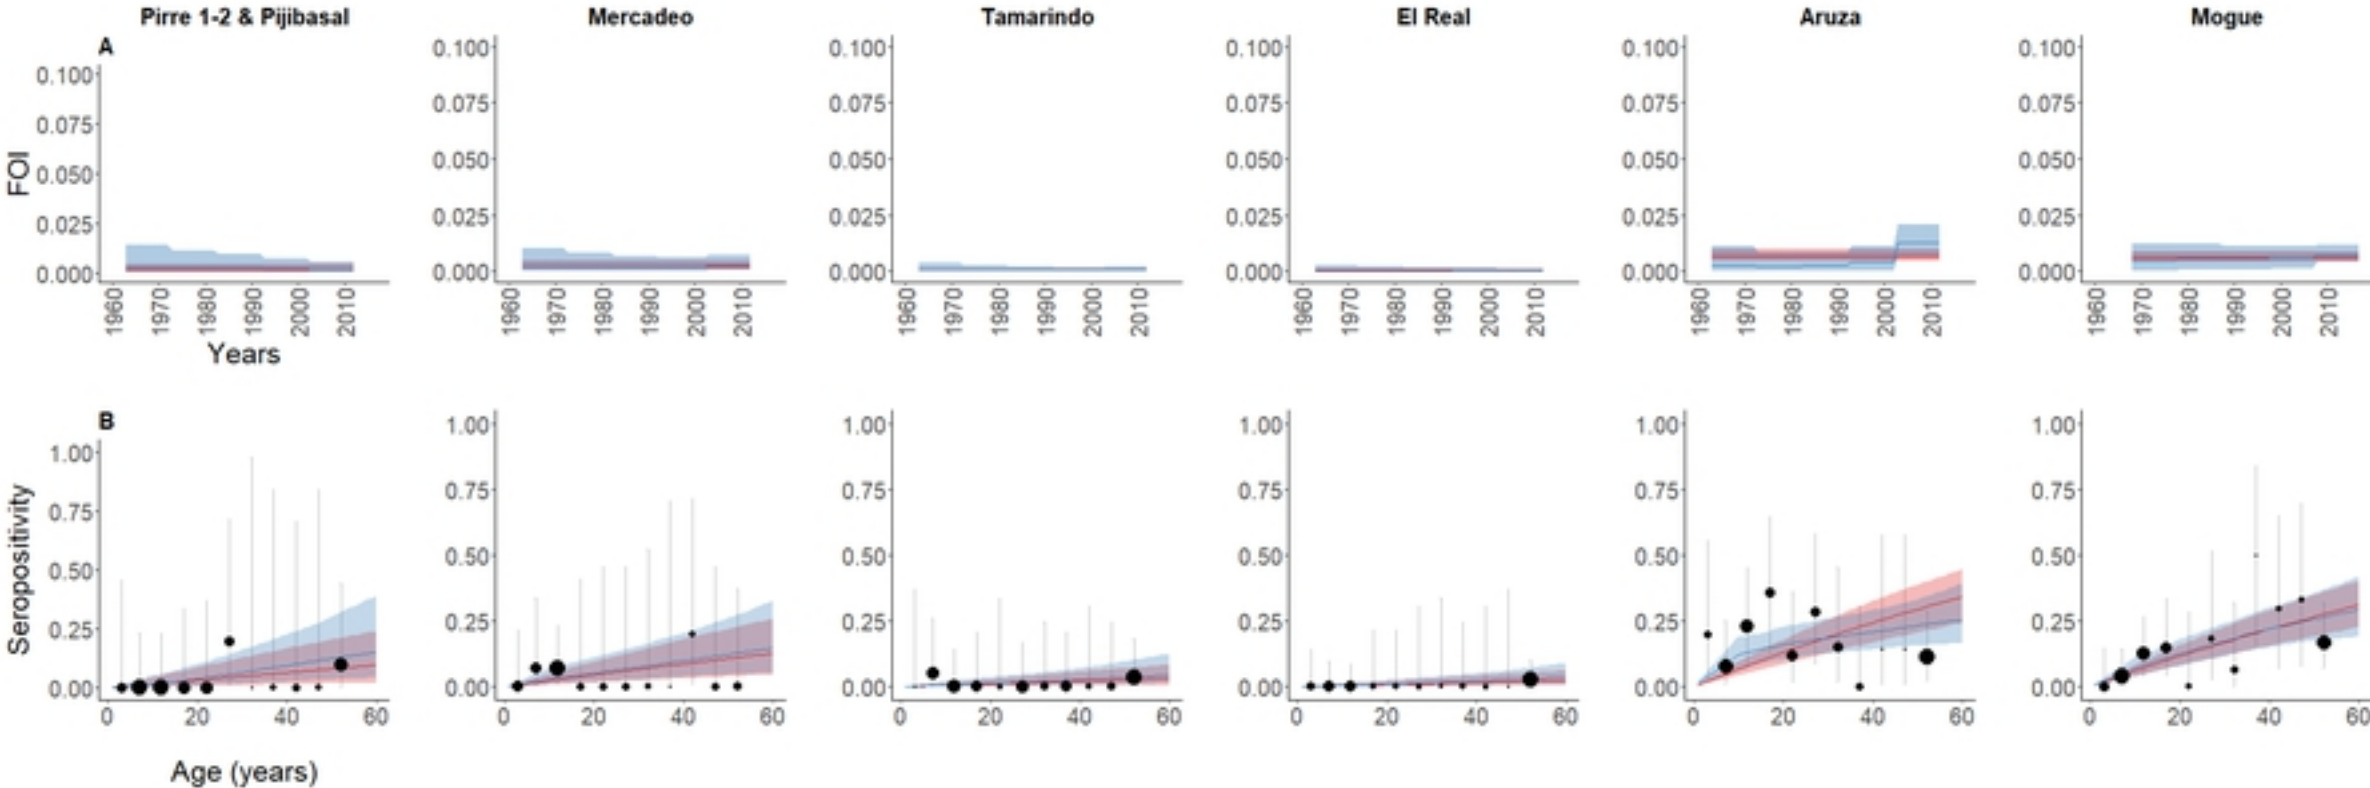

Figure2

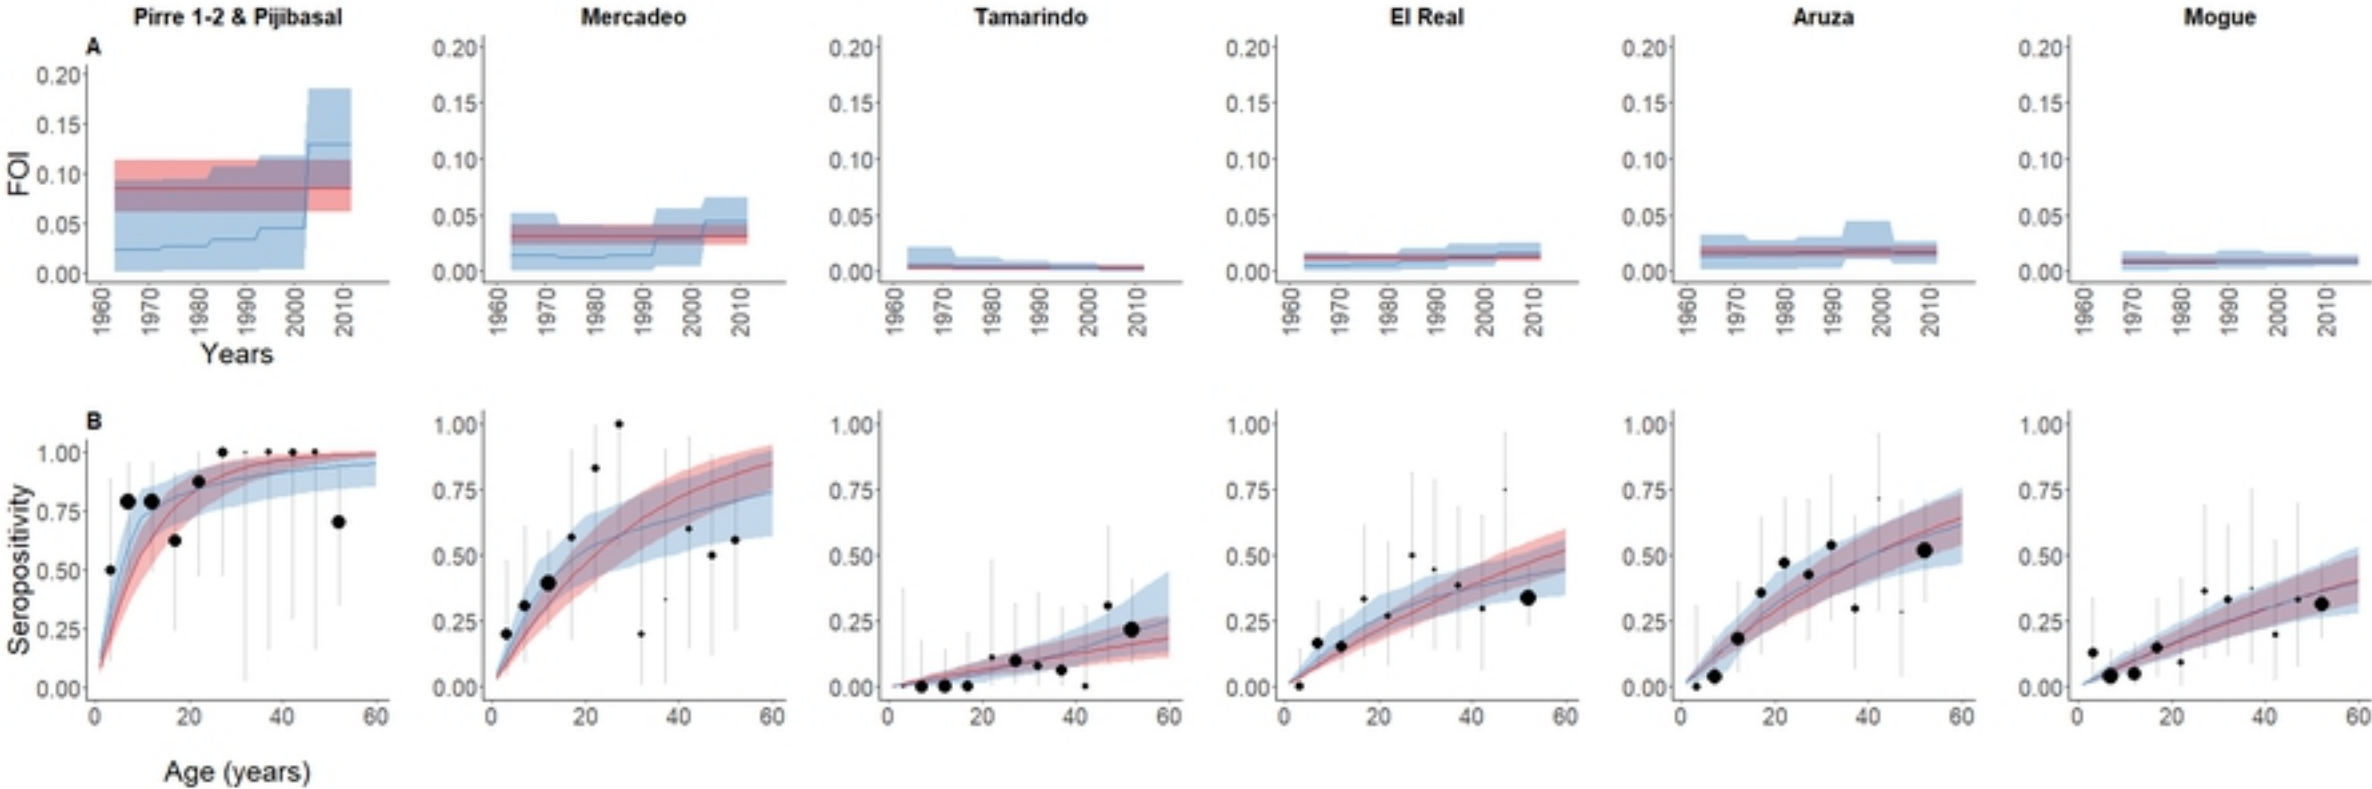

Figure3

# Mogue

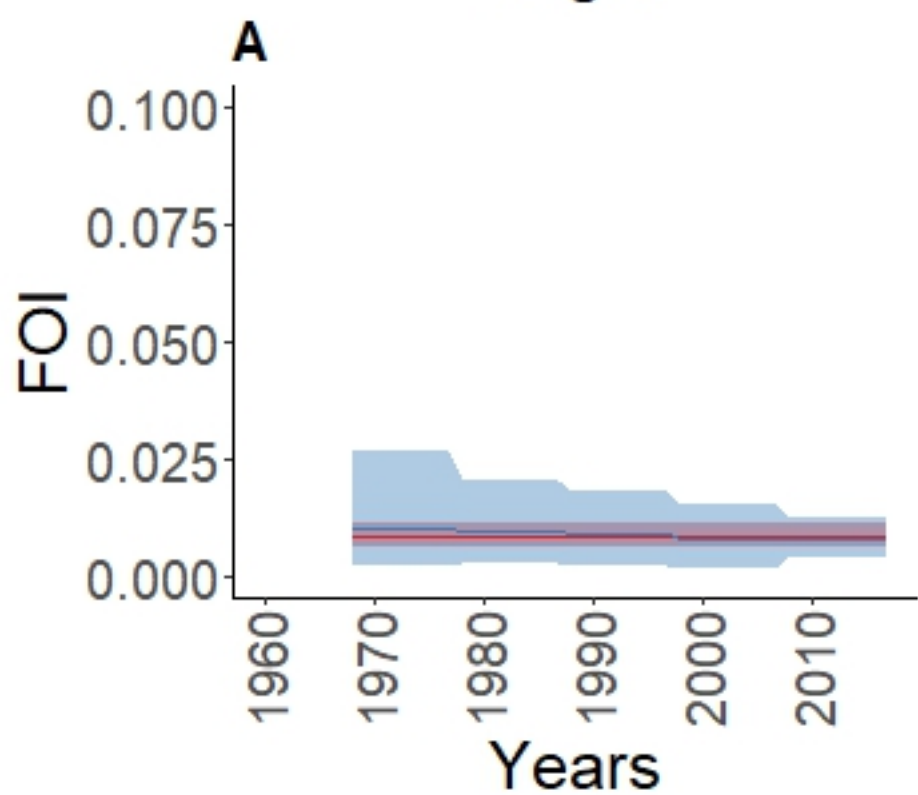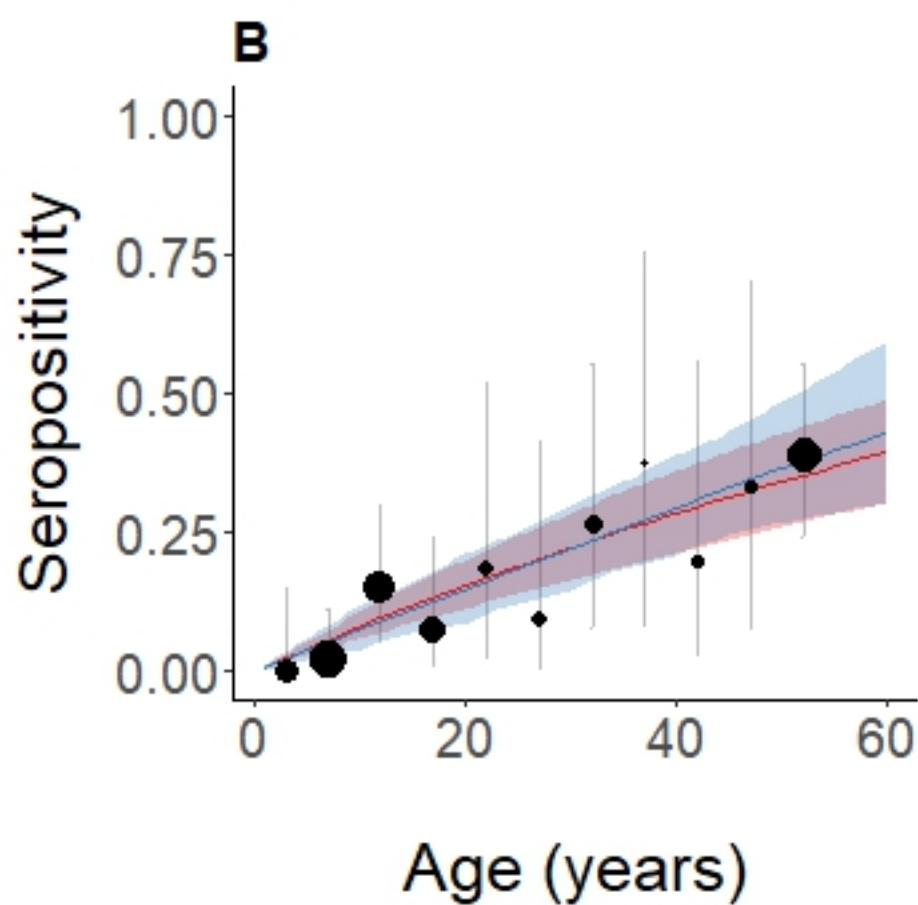

Figure4
